# Supplementary material for: Associations between Problematic Smartphone Use, Unhealthy Behaviors, and Mental Health Status in Korean Adolescents: Based on Data from the 13th Korea Youth Risk Behavior Survey (2017)
Source: PubMed Central journal article supplement — Psychiatry Investig. 2020 Dec 23;17(12):1216–25. doi: 10.30773/pi.2020.0007 (PMC8560339; doi:10.30773/pi.2020.0007), 2020-12-23
Supplement: pi-2020-0007-suppl1.pdf [file pi-2020-0007-suppl1.pdf]

**Supplementary Table 1-1.** Association between smartphone use duration and main purpose, unhealthy behaviors, and mental health status among boys

| Variables                                            | Smoking            |                  | Drinking     |                  | Physical inactivity $\geq 3$ days/week |                          | Skipping breakfast $\geq 5$ times/week |                          | Eating fast food $\geq 3$ times/week |                          |
|------------------------------------------------------|--------------------|------------------|--------------|------------------|----------------------------------------|--------------------------|----------------------------------------|--------------------------|--------------------------------------|--------------------------|
| Total, N (%)                                         | 2,428 (9.4)        | OR (95% CI)*     | 4,835 (18.6) | OR (95% CI)*     | 21,348 (80.1)                          | OR (95% CI)*             | 6,129 (22.7)                           | OR (95% CI)*             | 5,652 (21.5)                         | OR (95% CI)*             |
| Number of hours spent using a smartphone on weekdays |                    |                  |              |                  |                                        |                          |                                        |                          |                                      |                          |
| <2                                                   | 424 (5.3)          | 1.00             | 1,077 (12.9) | 1.00             | 6,844 (80.2)                           | 1.00                     | 1,596 (18.4)                           | 1.00                     | 1,403 (16.4)                         | 1.00                     |
| >2, <4                                               | 835 (7.9)          | 1.38 (1.21–1.58) | 1,887 (17.5) | 1.36 (1.24–1.50) | 8,865 (80.2)                           | 0.99 (0.92–1.08)         | 2,538 (22.7)                           | 1.21 (1.11–1.31)         | 2,286 (21.2)                         | 1.37 (1.27–1.48)         |
| $\geq 4$                                             | 1,169 (16.8)       | 2.82 (2.45–3.23) | 1,871 (27.1) | 2.25 (2.02–2.50) | 5,639 (80.0)                           | 0.98 (0.89–1.07)         | 1,995 (28.0)                           | 1.46 (1.33–1.60)         | 1,963 (28.2)                         | 1.97 (1.80–2.15)         |
| Number of hours spent using a smartphone on weekends |                    |                  |              |                  |                                        |                          |                                        |                          |                                      |                          |
| <4                                                   | 726 (6.3)          | 1.00             | 1,681 (14.1) | 1.00             | 9,879 (80.4)                           | 1.00                     | 2,475 (19.9)                           | 1.00                     | 2,218 (18.4)                         | 1.00                     |
| >4, <8                                               | 876 (9.4)          | 1.38 (1.24–1.53) | 1,887 (19.7) | 1.42 (1.31–1.53) | 7,841 (80.0)                           | 0.96 (0.90–1.04)         | 2,353 (23.7)                           | 1.16 (1.08–1.25)         | 2,177 (22.6)                         | 1.28 (1.19–1.38)         |
| $\geq 8$                                             | 826 (18.6)         | 2.76 (2.46–3.09) | 1,267 (28.8) | 2.27 (2.05–2.52) | 3,628 (79.8)                           | 0.96 (0.87–1.06)         | 1,301 (28.7)                           | 1.38 (1.26–1.51)         | 1,257 (28.2)                         | 1.71 (1.55–1.88)         |
| Main purpose for using a smartphone                  |                    |                  |              |                  |                                        |                          |                                        |                          |                                      |                          |
| Education                                            | 161 (6.5)          | 1.00             | 396 (15.6)   | 1.00             | 2,175 (82.6)                           | 1.00                     | 518 (19.6)                             | 1.00                     | 483 (19.4)                           | 1.00                     |
| Communication                                        | 1,357 (15.7)       | 2.76 (2.29–3.33) | 2,319 (26.7) | 2.21 (1.94–2.51) | 6,794 (77.2)                           | 0.76 (0.67–0.86)         | 2,091 (23.4)                           | 1.15 (1.02–1.29)         | 2,176 (25.1)                         | 1.37 (1.21–1.55)         |
| Enjoyment                                            | 910 (6.2)          | 1.09 (0.91–1.32) | 2,120 (14.2) | 1.13 (0.99–1.29) | 12,379 (81.4)                          | 1.04 (0.92–1.18)         | 3,520 (22.9)                           | 1.09 (0.97–1.22)         | 2,993 (19.8)                         | 1.05 (0.93–1.19)         |
| Variables                                            | Sleep disturbances |                  | Stress       |                  | Depressive symptoms                    |                          | Suicidal ideation                      |                          | Suicide attempt                      |                          |
| Total, N (%)                                         | 18,549 (70.1)      | OR (95% CI)*     | 8,146 (30.5) | OR (95% CI)*     | 5,426 (20.4)                           | OR (95% CI) <sup>†</sup> | 2,500 (9.3)                            | OR (95% CI) <sup>‡</sup> | 499 (1.8)                            | OR (95% CI) <sup>‡</sup> |
| Number of hours spent using a smartphone on weekdays |                    |                  |              |                  |                                        |                          |                                        |                          |                                      |                          |
| <2                                                   | 5,761 (68.1)       | 1.00             | 2,456 (28.8) | 1.00             | 1,566 (18.3)                           | 1.00                     | 718 (8.5)                              | 1.00                     | 145 (1.7)                            | 1.00                     |
| >2, <4                                               | 7,732 (70.3)       | 1.06 (0.99–1.13) | 3,267 (29.5) | 1.00 (0.93–1.07) | 2,152 (19.7)                           | 1.06 (0.98–1.15)         | 994 (8.9)                              | 1.00 (0.89–1.11)         | 175 (1.5)                            | 0.86 (0.67–1.11)         |
| $\geq 4$                                             | 5,056 (72.1)       | 1.11 (1.02–1.21) | 2,423 (34.1) | 1.16 (1.07–1.26) | 1,708 (24.1)                           | 1.25 (1.13–1.37)         | 788 (11.0)                             | 1.10 (0.97–1.25)         | 179 (2.5)                            | 1.26 (0.96–1.65)         |
| Number of hours spent using a smartphone on weekends |                    |                  |              |                  |                                        |                          |                                        |                          |                                      |                          |
| <4                                                   | 8,164 (67.2)       | 1.00             | 3,420 (28.0) | 1.00             | 2,265 (18.7)                           | 1.00                     | 1,029 (8.4)                            | 1.00                     | 219 (1.7)                            | 1.00                     |
| >4, <8                                               | 7,065 (72.2)       | 1.20 (1.13–1.28) | 3,023 (30.5) | 1.08 (1.01–1.16) | 2,003 (20.4)                           | 1.03 (0.96–1.11)         | 916 (9.1)                              | 0.98 (0.89–1.09)         | 153 (1.5)                            | 0.82 (0.65–1.04)         |
| $\geq 8$                                             | 3,320 (73.5)       | 1.27 (1.16–1.40) | 1,703 (37.3) | 1.42 (1.30–1.54) | 1,158 (25.3)                           | 1.21 (1.09–1.34)         | 555 (12.4)                             | 1.20 (1.05–1.38)         | 127 (2.9)                            | 1.30 (0.99–1.72)         |
| Main purpose for using a smartphone                  |                    |                  |              |                  |                                        |                          |                                        |                          |                                      |                          |
| Education                                            | 1,833 (70.8)       | 1.00             | 846 (32.1)   | 1.00             | 557 (20.8)                             | 1.00                     | 237 (8.8)                              | 1.00                     | 51 (1.9)                             | 1.00                     |
| Communication                                        | 6,613 (74.9)       | 1.30 (1.17–1.44) | 2,695 (30.4) | 0.92 (0.84–1.01) | 2,097 (23.8)                           | 1.20 (1.06–1.35)         | 884 (10.0)                             | 1.12 (0.94–1.33)         | 175 (2.0)                            | 1.00 (0.70–1.42)         |
| Enjoyment                                            | 10,103 (67.0)      | 0.99 (0.90–1.10) | 4,605 (30.2) | 0.93 (0.85–1.02) | 2,772 (18.3)                           | 0.87 (0.77–0.98)         | 1,379 (9.0)                            | 1.02 (0.97–1.20)         | 273 (1.8)                            | 0.87 (0.62–1.22)         |

\*adjusted for school year, perceived academic record, family structure, parental educational level, perceived economic status, and place of residence, <sup>†</sup>adjusted for school year, perceived school record, family structure, parental educational level, perceived economic status, place of residence, and stress, <sup>‡</sup>adjusted for school year, perceived academic record, family structure, parental educational level, perceived economic status, place of residence, stress, and depressive symptoms. OR: odds ratio; CI: confidence interval

**Supplementary Table 1-2.** Association between smartphone use duration and main purpose, unhealthy behaviors, and mental health status among girls

| Variables                                            | Smoking            |                  | Drinking      |                  | Physical inactivity ≥3 days/week |                  | Skipping breakfast ≥5 times/week |                  | Eating fast food ≥3 times/week |                  |
|------------------------------------------------------|--------------------|------------------|---------------|------------------|----------------------------------|------------------|----------------------------------|------------------|--------------------------------|------------------|
| Total, N (%)                                         | 811 (3.0)          | OR (95% CI)*     | 3,709 (13.9)  | OR (95% CI)*     | 25,467 (92.6)                    | OR (95% CI)*     | 6,652 (24.1)                     | OR (95% CI)*     | 5,248 (19.4)                   | OR (95% CI)*     |
| Number of hours spent using a smartphone on weekdays |                    |                  |               |                  |                                  |                  |                                  |                  |                                |                  |
| <2                                                   | 79 (1.4)           | 1.00             | 413 (7.3)     | 1.00             | 5,430 (93.1)                     | 1.00             | 1,026 (17.4)                     | 1.00             | 740 (12.8)                     | 1.00             |
| >2, <4                                               | 178 (1.6)          | 0.99 (0.73–1.34) | 1,294 (11.5)  | 1.64 (1.44–1.87) | 10,620 (92.6)                    | 0.96 (0.84–1.09) | 2,537 (22.1)                     | 1.25 (1.14–1.38) | 2,029 (18.2)                   | 1.49 (1.35–1.65) |
| ≥4                                                   | 554 (5.6)          | 2.92 (2.19–3.91) | 2,002 (20.6)  | 3.14 (2.74–3.61) | 9,417 (92.3)                     | 1.01 (0.87–1.16) | 3,089 (30.3)                     | 1.72 (1.55–1.90) | 2,479 (24.7)                   | 2.12 (1.90–2.36) |
| Number of hours spent using a smartphone on weekends |                    |                  |               |                  |                                  |                  |                                  |                  |                                |                  |
| <4                                                   | 131 (1.6)          | 1.00             | 656 (8.4)     | 1.00             | 7,500 (92.6)                     | 1.00             | 1,529 (18.6)                     | 1.00             | 1,113 (13.9)                   | 1.00             |
| >4, <8                                               | 220 (2.0)          | 1.06 (0.82–1.36) | 1,435 (13.0)  | 1.53 (1.37–1.70) | 10,673 (93.0)                    | 1.08 (0.95–1.22) | 2,632 (23.0)                     | 1.20 (1.11–1.30) | 2,160 (19.2)                   | 1.43 (1.31–1.56) |
| ≥8                                                   | 460 (6.0)          | 2.64 (2.06–3.38) | 1,618 (21.6)  | 2.77 (2.45–3.13) | 7,294 (92.0)                     | 1.01 (0.87–1.16) | 2,491 (31.8)                     | 1.69 (1.55–1.84) | 1,975 (25.6)                   | 2.02 (1.84–2.21) |
| Main purpose for using a smartphone                  |                    |                  |               |                  |                                  |                  |                                  |                  |                                |                  |
| Education                                            | 32 (2.0)           | 1.00             | 139 (9.1)     | 1.00             | 1,456 (94.1)                     | 1.00             | 309 (20.0)                       | 1.00             | 232 (14.9)                     | 1.00             |
| Communication                                        | 642 (3.9)          | 1.91 (1.26–2.91) | 2,699 (16.6)  | 2.43 (1.96–3.02) | 15,448 (92.4)                    | 0.89 (0.71–1.13) | 4,237 (25.4)                     | 1.22 (1.05–1.41) | 3,369 (20.5)                   | 1.44 (1.23–1.70) |
| Enjoyment                                            | 137 (1.5)          | 0.74 (0.48–1.16) | 871 (10.0)    | 1.34 (1.07–1.67) | 8,563 (92.7)                     | 0.93 (0.73–1.19) | 2,106 (22.5)                     | 1.05 (0.90–1.22) | 1,647 (18.3)                   | 1.27 (1.07–1.51) |
| Variables                                            | Sleep disturbances |                  | Stress        |                  | Depressive symptoms              |                  | Suicidal ideation                |                  | Suicide attempt                |                  |
| Total, N (%)                                         | 22,441 (81.8)      | OR (95% CI)a     | 12,440 (44.8) | OR (95% CI)*     | 8,424 (30.5)                     | OR (95% CI)†     | 4,214 (15.2)                     | OR (95% CI)‡     | 888 (3.2)                      | OR (95% CI)‡     |
| Number of hours spent using a smartphone on weekdays |                    |                  |               |                  |                                  |                  |                                  |                  |                                |                  |
| <2                                                   | 4,618 (79.5)       | 1.00             | 2,454 (41.8)  | 1.00             | 1,491 (25.4)                     | 1.00             | 759 (13.1)                       | 1.00             | 149 (2.5)                      | 1.00             |
| >2, <4                                               | 9,277 (81.1)       | 1.08 (0.99–1.19) | 4,946 (42.8)  | 1.02 (0.95–1.08) | 3,232 (28.1)                     | 1.11 (1.02–1.21) | 1,548 (13.2)                     | 0.93 (0.83–1.04) | 287 (2.4)                      | 0.86 (0.68–1.08) |
| ≥4                                                   | 8,546 (84.0)       | 1.32 (1.19–1.47) | 5,040 (49.0)  | 1.23 (1.14–1.33) | 3,701 (36.4)                     | 1.42 (1.30–1.56) | 1,907 (18.6)                     | 1.08 (0.96–1.21) | 452 (4.4)                      | 1.13 (0.90–1.42) |
| Number of hours spent using a smartphone on weekends |                    |                  |               |                  |                                  |                  |                                  |                  |                                |                  |
| <4                                                   | 6,308 (78.6)       | 1.00             | 3,316 (41.0)  | 1.00             | 2,086 (25.9)                     | 1.00             | 998 (12.5)                       | 1.00             | 197 (2.5)                      | 1.00             |
| >4, <8                                               | 9,427 (82.2)       | 1.18 (1.09–1.28) | 5,073 (44.0)  | 1.08 (1.02–1.15) | 3,431 (29.9)                     | 1.13 (1.04–1.22) | 1,632 (14.1)                     | 1.03 (0.92–1.14) | 298 (2.5)                      | 0.87 (0.70–1.08) |
| ≥8                                                   | 6,706 (84.8)       | 1.46 (1.32–1.61) | 4,051 (50.3)  | 1.34 (1.24–1.44) | 2,907 (36.7)                     | 1.35 (1.24–1.47) | 1,584 (19.7)                     | 1.25 (1.11–1.41) | 393 (4.9)                      | 1.29 (1.04–1.59) |
| Main purpose for using a smartphone                  |                    |                  |               |                  |                                  |                  |                                  |                  |                                |                  |
| Education                                            | 1,202 (78.3)       | 1.00             | 712 (46.3)    | 1.00             | 441 (28.8)                       | 1.00             | 2,574 (15.3)                     | 1.00             | 42 (2.8)                       | 1.00             |
| Communication                                        | 13,857 (83.1)      | 1.53 (1.32–1.78) | 7,549 (44.7)  | 0.95 (0.86–1.06) | 5,321 (31.7)                     | 1.11 (0.97–1.28) | 1,435 (15.3)                     | 1.04 (0.87–1.24) | 544 (3.2)                      | 0.88 (0.63–1.23) |
| Enjoyment                                            | 7,382 (80.1)       | 1.27 (1.11–1.48) | 4,179 (44.8)  | 0.96 (0.86–1.07) | 2,662 (28.7)                     | 0.96 (0.83–1.12) | 205 (13.1)                       | 1.14 (0.95–1.36) | 302 (3.2)                      | 0.96 (0.68–1.36) |

\*adjusted for school year, perceived academic record, family structure, parental educational level, perceived economic status, and place of residence, †adjusted for school year, perceived school record, family structure, parental educational level, perceived economic status, place of residence, and stress, ‡adjusted for school year, perceived academic record, family structure, parental educational level, perceived economic status, place of residence, stress, and depressive symptoms. OR: odds ratio, CI: confidence interval
