# Supplementary material for: Associations between Problematic Smartphone Use, Unhealthy Behaviors, and Mental Health Status in Korean Adolescents: Based on Data from the 13th Korea Youth Risk Behavior Survey (2017)
Source: PubMed Central journal article supplement — Psychiatry Investig. 2020 Dec 23;17(12):1216–25. doi: 10.30773/pi.2020.0007 (PMC8560339; doi:10.30773/pi.2020.0007), 2020-12-23
Supplement: pi-2020-0007-suppl2.pdf [file pi-2020-0007-suppl2.pdf]

**Supplementary Table 2-1.** Association between conflicts with family and friends and academic problems owing to smartphone use, unhealthy behaviors, and mental health status among boys

| Variables                                             | Smoking            |                  | Drinking     |                          | Physical inactivity $\geq 3$ days/week |                          | Skipping breakfast $\geq 5$ times/week |                          | Eating fast food $\geq 3$ times/week |                          |
|-------------------------------------------------------|--------------------|------------------|--------------|--------------------------|----------------------------------------|--------------------------|----------------------------------------|--------------------------|--------------------------------------|--------------------------|
|                                                       | N (%)              | OR (95% CI)*     | N (%)        | OR (95% CI) <sup>a</sup> | N (%)                                  | OR (95% CI)*             | N (%)                                  | OR (95% CI)*             | N (%)                                | OR (95% CI)*             |
| Severe conflicts with family owing to smartphone use  |                    |                  |              |                          |                                        |                          |                                        |                          |                                      |                          |
| No                                                    | 1,880 (9.2)        | 1.00             | 3,847 (18.5) | 1.00                     | 16,993 (79.9)                          | 1.00                     | 4,991 (23.1)                           | 1.00                     | 4,280 (20.4)                         | 1.00                     |
| Yes                                                   | 548 (10.2)         | 1.30 (1.16–1.47) | 988 (18.6)   | 1.17 (1.07–1.28)         | 4,355 (81.3)                           | 1.16 (1.07–1.27)         | 1,138 (21.0)                           | 0.89 (0.83–0.96)         | 1,372 (26.1)                         | 1.40 (1.30–1.50)         |
| Severe conflicts with friends owing to smartphone use |                    |                  |              |                          |                                        |                          |                                        |                          |                                      |                          |
| No                                                    | 1,815 (8.8)        | 1.00             | 3,689 (17.6) | 1.00                     | 17,004 (79.1)                          | 1.00                     | 5,021 (23.0)                           | 1.00                     | 4,337 (20.4)                         | 1.00                     |
| Yes                                                   | 613 (11.9)         | 1.13 (1.01–1.27) | 1,146 (22.5) | 1.08 (0.99–1.18)         | 4,344 (84.4)                           | 1.32 (1.20–1.45)         | 1,108 (21.6)                           | 0.93 (0.85–1.00)         | 1,315 (26.0)                         | 1.31 (1.22–1.42)         |
| Academic problems owing to smartphone use             |                    |                  |              |                          |                                        |                          |                                        |                          |                                      |                          |
| No                                                    | 2,251 (9.0)        | 1.00             | 4,587 (18.1) | 1.00                     | 20,739 (80.2)                          | 1.00                     | 5,918 (22.6)                           | 1.00                     | 5,402 (21.2)                         | 1.00                     |
| Yes                                                   | 177 (23.2)         | 3.07 (2.49–3.78) | 248 (32.7)   | 2.37 (1.99–2.83)         | 609 (78.3)                             | 0.93 (0.78–1.12)         | 211 (27.4)                             | 1.21 (1.02–1.43)         | 250 (32.5)                           | 1.74 (1.48–2.03)         |
| Variables                                             | Sleep disturbances |                  | Stress       |                          | Depressive symptoms                    |                          | Suicide ideation                       |                          | Suicide attempt                      |                          |
|                                                       | N (%)              | OR (95% CI)*     | N (%)        | OR (95% CI)*             | N (%)                                  | OR (95% CI) <sup>†</sup> | N (%)                                  | OR (95% CI) <sup>‡</sup> | N (%)                                | OR (95% CI) <sup>‡</sup> |
| Severe conflicts with family owing to smartphone use  |                    |                  |              |                          |                                        |                          |                                        |                          |                                      |                          |
| No                                                    | 14,640 (69.2)      | 1.00             | 5,965 (27.9) | 1.00                     | 3,862 (18.2)                           | 1.00                     | 1,695 (7.9)                            | 1.00                     | 334 (1.5)                            | 1.00                     |
| Yes                                                   | 3,909 (73.6)       | 1.35 (1.25–1.46) | 2,181 (40.3) | 1.79 (1.67–1.92)         | 1,564 (28.9)                           | 1.56 (1.44–1.70)         | 805 (14.8)                             | 1.44 (1.28–1.62)         | 165 (3.0)                            | 1.38 (1.11–1.71)         |
| Severe conflicts with friends owing to smartphone use |                    |                  |              |                          |                                        |                          |                                        |                          |                                      |                          |
| No                                                    | 14,453 (67.6)      | 1.00             | 6,037 (27.8) | 1.00                     | 3,908 (18.2)                           | 1.00                     | 1,755 (8.1)                            | 1.00                     | 371 (1.7)                            | 1.00                     |
| Yes                                                   | 4,096 (80.0)       | 1.59 (1.47–1.73) | 2,109 (40.9) | 1.71 (1.59–1.83)         | 1,518 (29.0)                           | 1.46 (1.33–1.60)         | 745 (14.2)                             | 1.31 (1.16–1.48)         | 128 (2.5)                            | 1.07 (0.85–1.35)         |
| Academic problems owing to smartphone use             |                    |                  |              |                          |                                        |                          |                                        |                          |                                      |                          |
| No                                                    | 17,978 (70.0)      | 1.00             | 7,750 (29.9) | 1.00                     | 5,079 (19.7)                           | 1.00                     | 2,333 (8.9)                            | 1.00                     | 441 (1.7)                            | 1.00                     |
| Yes                                                   | 571 (73.9)         | 1.25 (1.06–1.48) | 396 (50.0)   | 2.28 (1.94–2.68)         | 347 (45.7)                             | 2.78 (2.31–3.34)         | 167 (22.0)                             | 1.38 (1.10–1.73)         | 58 (7.2)                             | 2.18 (1.55–3.08)         |

\*adjusted for school year, perceived academic record, family structure, parental educational level, perceived economic status, and place of residence, <sup>†</sup>Adjusted for school year, perceived academic record, family structure, parental educational level, perceived economic status, place of residence, and stress, <sup>‡</sup>adjusted for school year, perceived academic record, family structure, parental educational level, perceived economic status, place of residence, stress, and depressive symptoms. OR: odds ratio, CI: confidence interval

**Supplementary Table 2-2.** Association between conflicts with family and friends and academic problems owing to smartphone use, unhealthy behaviors, and mental health status among girls

| Variables                                             | Smoking            |                  | Drinking      |                  | Physical inactivity $\geq 3$ days/week |                  | Skipping breakfast $\geq 5$ times/week |                  | Eating fast food $\geq 3$ times/week |                  |
|-------------------------------------------------------|--------------------|------------------|---------------|------------------|----------------------------------------|------------------|----------------------------------------|------------------|--------------------------------------|------------------|
|                                                       | N (%)              | OR (95% CI)*     | N (%)         | OR (95% CI)*     | N (%)                                  | OR (95% CI)*     | N (%)                                  | OR (95% CI)*     | N (%)                                | OR (95% CI)*     |
| Severe conflicts with family owing to smartphone use  |                    |                  |               |                  |                                        |                  |                                        |                  |                                      |                  |
| No                                                    | 557 (2.8)          | 1.00             | 2,711 (13.5)  | 1.00             | 19,340 (92.5)                          | 1.00             | 5,072 (24.2)                           | 1.00             | 3,723 (18.0)                         | 1.00             |
| Yes                                                   | 254 (3.8)          | 1.58 (1.33–1.88) | 998 (15.5)    | 1.41 (1.29–1.54) | 6,127 (92.9)                           | 1.16 (1.03–1.30) | 1,580 (23.9)                           | 0.99 (0.92–1.06) | 1,525 (23.6)                         | 1.43 (1.32–1.55) |
| Severe conflicts with friends owing to smartphone use |                    |                  |               |                  |                                        |                  |                                        |                  |                                      |                  |
| No                                                    | 560 (3.0)          | 1.00             | 2,368 (12.7)  | 1.00             | 17,654 (91.8)                          | 1.00             | 4,605 (23.7)                           | 1.00             | 3,299 (17.3)                         | 1.00             |
| Yes                                                   | 251 (3.0)          | 0.85 (0.72–1.00) | 1,341 (16.7)  | 1.15 (1.05–1.25) | 7,813 (94.3)                           | 1.42 (1.26–1.60) | 2,047 (24.8)                           | 1.04 (0.97–1.11) | 1,949 (23.9)                         | 1.44 (1.34–1.55) |
| Academic problems owing to smartphone use             |                    |                  |               |                  |                                        |                  |                                        |                  |                                      |                  |
| No                                                    | 706 (2.7)          | 1.00             | 3,455 (13.6)  | 1.00             | 24,442 (92.7)                          | 1.00             | 6,325 (23.9)                           | 1.00             | 4,933 (19.1)                         | 1.00             |
| Yes                                                   | 105 (9.4)          | 3.43 (2.50–4.70) | 254 (22.6)    | 2.18 (1.84–2.60) | 1,025 (91.5)                           | 1.00 (0.78–1.27) | 327 (29.0)                             | 1.20 (1.02–1.42) | 315 (27.6)                           | 1.58 (1.36–1.83) |
| Variables                                             | Sleep disturbances |                  | Stress        |                  | Depressive symptoms                    |                  | Suicide ideation                       |                  | Suicide attempt                      |                  |
|                                                       | N (%)              | OR (95% CI)*     | N (%)         | OR (95% CI)*     | N (%)                                  | OR (95% CI)†     | N (%)                                  | OR (95% CI)‡     | N (%)                                | OR (95% CI)‡     |
| Severe conflicts with family owing to smartphone use  |                    |                  |               |                  |                                        |                  |                                        |                  |                                      |                  |
| No                                                    | 16,816 (80.6)      | 1.00             | 8,652 (40.9)  | 1.00             | 5,599 (26.7)                           | 1.00             | 2,550 (12.1)                           | 1.00             | 524 (2.4)                            | 1.00             |
| Yes                                                   | 5,625 (85.6)       | 1.57 (1.44–1.71) | 3,788 (57.0)  | 2.01 (1.89–2.14) | 2,825 (42.3)                           | 1.69 (1.58–1.81) | 1,664 (24.8)                           | 1.65 (1.52–1.80) | 364 (5.4)                            | 1.47 (1.25–1.72) |
| Severe conflicts with friends owing to smartphone use |                    |                  |               |                  |                                        |                  |                                        |                  |                                      |                  |
| No                                                    | 15,243 (79.4)      | 1.00             | 7,923 (40.7)  | 1.00             | 5,197 (26.8)                           | 1.00             | 2,600 (13.4)                           | 1.00             | 593 (3.1)                            | 1.00             |
| Yes                                                   | 7,198 (86.9)       | 1.49 (1.37–1.63) | 4,517 (53.9)  | 1.62 (1.53–1.71) | 3,227 (38.5)                           | 1.43 (1.34–1.53) | 1,614 (19.0)                           | 1.16 (1.07–1.26) | 295 (3.4)                            | 0.88 (0.75–1.03) |
| Academic problems owing to smartphone use             |                    |                  |               |                  |                                        |                  |                                        |                  |                                      |                  |
| No                                                    | 21,480 (81.6)      | 1.00             | 11,707 (44.0) | 1.00             | 7,787 (29.4)                           | 1.00             | 3,857 (14.5)                           | 1.00             | 783 (2.9)                            | 1.00             |
| Yes                                                   | 961 (85.8)         | 1.53 (1.25–1.88) | 733 (64.3)    | 2.34 (2.02–2.71) | 637 (56.8)                             | 2.50 (2.19–2.86) | 357 (31.6)                             | 1.42 (1.18–1.70) | 105 (9.2)                            | 1.65 (1.26–2.16) |

\*adjusted for gender, school year, perceived academic record, family structure, parental educational level, perceived economic status, and place of residence, †adjusted for gender, school year, perceived academic record, family structure, parental educational level, perceived economic status, place of residence, and stress, ‡adjusted for gender, school year, perceived academic record, family structure, parental educational level, perceived economic status, place of residence, stress, and depressive symptoms. OR: odds ratio, CI: confidence interval
